# Supplementary material
Source: HighWire-hosted journal article supplement (https://erj.ersjournals.com/content/52/4/1800246)
Supplement: inline-supplementary-material-1 [file inline-supplementary-material-1.pdf]

**Supplementary Table S1.** Sociodemographic and clinical characteristics of participants with WGS available (N = 344) according to SNP differences to the closest other study participant.

| Characteristic                                          | Total<br>(N = 344)<br>N (%) | 0-2 SNPs<br>(N = 95)<br>N (%) | 3-5 SNPs<br>(N = 97)<br>N (%) | 6-10 SNPs<br>(N = 67)<br>N (%) | > 10 SNPs<br>(N = 85)<br>N (%) | p-value <sup>a</sup> |
|---------------------------------------------------------|-----------------------------|-------------------------------|-------------------------------|--------------------------------|--------------------------------|----------------------|
| Female sex                                              | 202 (59)                    | 52 (55)                       | 66 (68)                       | 39 (58)                        | 45 (53)                        | 0.15                 |
| Age (median, IQR)                                       | 34 (28-43)                  | 35 (29-43)                    | 34 (26-47)                    | 35 (30-45)                     | 32 (28-39)                     | 0.20                 |
| Monthly household income<br>≤ 2500 ZAR <sup>b</sup>     | 273 (79)                    | 72 (76)                       | 85 (88)                       | 54 (81)                        | 62 (73)                        | 0.07                 |
| Ever smoker                                             | 35 (10)                     | 11 (12)                       | 9 (9)                         | 4 (6)                          | 11 (13)                        | 0.51                 |
| Healthcare worker                                       | 24 (7)                      | 8 (8)                         | 3 (3)                         | 8 (12)                         | 5 (6)                          | 0.15                 |
| Mine worker                                             | 5 (1)                       | 1 (1)                         | 0 (0)                         | 3 (4)                          | 1 (1)                          | 0.12                 |
| Diabetes                                                | 22 (6)                      | 3 (3)                         | 6 (6)                         | 10 (15)                        | 3 (4)                          | <b>0.01</b>          |
| HIV-positive                                            | 266 (77)                    | 76 (80)                       | 74 (76)                       | 55 (82)                        | 61 (72)                        | 0.42                 |
| Median CD4 cell count (IQR)<br>(cells/mm <sup>3</sup> ) | 240 (111-420)               | 212 (87-375)                  | 296 (120-461)                 | 194 (97-327)                   | 311 (167-434)                  | <b>0.03</b>          |
| Viral load undetectable                                 | 133 (50)                    | 37 (49)                       | 38 (51)                       | 27 (49)                        | 31 (51)                        | 0.99                 |
| Receiving ART at study<br>enrollment <sup>c</sup>       | 153 (74)                    | 44 (76)                       | 35 (65)                       | 30 (71)                        | 44 (85)                        | 0.13                 |
| Cough                                                   | 284 (83)                    | 83 (87)                       | 78 (80)                       | 57 (85)                        | 66 (78)                        | 0.31                 |
| Median duration – weeks (IQR)                           | 8 (4-12)                    | 8 (4-12)                      | 8 (4-12)                      | 10 (5-12)                      | 9 (4-12)                       | 0.75                 |
| Cavitation on CXR                                       | 60 (17)                     | 22 (23)                       | 15 (15)                       | 6 (9)                          | 17 (20)                        | 0.10                 |
| Acid-fast bacilli (AFB) smear positive                  | 235 (70)                    | 62 (67)                       | 65 (69)                       | 47 (73)                        | 61 (73)                        | 0.81                 |
| Any previous TB treatment                               | 247 (72)                    | 72 (76)                       | 63 (65)                       | 44 (66)                        | 68 (80)                        | 0.07                 |
| Prior drug-susceptible TB<br>treatment                  | 219 (64)                    | 64 (67)                       | 54 (56)                       | 41 (61)                        | 60 (71)                        | 0.16                 |
| Median duration<br>treatment – months (IQR)             | 6 (6-12)                    | 7 (6-12)                      | 7 (6-13)                      | 6 (6-10)                       | 6 (6-12)                       | 0.79                 |
| Prior multidrug-resistant TB                            | 105 (31)                    | 32 (34)                       | 23(24)                        | 10 (15)                        | 40 (47)                        | <b>&lt; 0.0001</b>   |

| treatment                                              |          |          |           |           |           |      |
|--------------------------------------------------------|----------|----------|-----------|-----------|-----------|------|
| Median duration<br>treatment – months (IQR)            | 6 (4-14) | 6 (5-14) | 10 (6-15) | 3.5 (3-4) | 6.5 (4-9) | 0.26 |
| Prior cure or treatment<br>completed <sup>d</sup>      | 7 (7)    | 3 (10)   | 2 (8)     | 0 (0)     | 2 (7)     | 0.22 |
| Prior treatment failure <sup>d</sup>                   | 80 (82)  | 23 (79)  | 21 (91)   | 10 (100)  | 21 (70)   |      |
| Prior lost to follow-up or<br>transferred <sup>d</sup> | 11 (11)  | 3 (10)   | 1 (4)     | 0 (0)     | 7 (23)    |      |

<sup>a</sup> P-values are chi-square, Fisher's exact or Kruskal-Wallis.

<sup>b</sup> Currency conversion during study period approximately 1 U.S. Dollar (USD) = 8.4 South African Rand (ZAR); 2500 ZAR = \$298 US.

<sup>c</sup> ART start date available for 206 (77%) of participants.

<sup>d</sup> Treatment outcome available for 98 (93%) of the 105 who reported prior MDR TB treatment.

**Supplementary Table S2.** Pairwise SNP distances between isolates within the same RLFP group (AH-W) and within the same cluster group (1001-2300). Cluster groups containing fewer than three isolates are excluded. Median pairwise distance is shown for the closest participant within a cluster and for the overall cluster.

| Cluster       | # Isolates | # WGS      | Lineage  | Family        | SNP distance   |                |
|---------------|------------|------------|----------|---------------|----------------|----------------|
|               |            |            |          |               | Median closest | Median overall |
| <b>10(AH)</b> | <b>15</b>  | <b>8</b>   | <b>4</b> | <b>X</b>      |                | <b>14</b>      |
| 1003          | 10         | 6          |          |               | 6              | 11.5           |
| <b>11(BF)</b> | <b>3</b>   | <b>1</b>   | <b>4</b> | <b>T</b>      | .              | .              |
| <b>12(BH)</b> | <b>6</b>   | <b>4</b>   | <b>4</b> | <b>S</b>      |                | <b>13</b>      |
| <b>13(BM)</b> | <b>2</b>   | <b>1</b>   | <b>4</b> | <b>S</b>      | .              | .              |
| <b>14(BW)</b> | <b>9</b>   | <b>5</b>   | <b>4</b> | <b>Harlem</b> |                | <b>18.5</b>    |
| 1401          | 6          | 3          |          |               | 6              | 24             |
| <b>15(CC)</b> | <b>7</b>   | <b>4</b>   | <b>4</b> | <b>LAM</b>    |                | <b>6.5</b>     |
| <b>16(GD)</b> | <b>2</b>   | <b>0</b>   | <b>3</b> | <b>CAS</b>    | .              | .              |
| <b>17(GY)</b> | <b>15</b>  | <b>11</b>  | <b>4</b> | <b>T</b>      |                | <b>20</b>      |
| 1701          | 4          | 3          |          |               | 10             | 20             |
| 1702          | 4          | 4          |          |               | 9              | 16             |
| <b>18(HP)</b> | <b>285</b> | <b>230</b> | <b>4</b> | <b>LAM</b>    |                | <b>18</b>      |
| 1801          | 4          | 4          |          |               | 7              | 23             |
| 1802          | 3          | 3          |          |               | 23             | 23             |
| 1805          | 4          | 4          |          |               | 19.5           | 23.5           |
| 1810          | 14         | 13         |          |               | 8              | 21.5           |

|      |     |     |  |  |      |      |
|------|-----|-----|--|--|------|------|
| 1817 | 5   | 5   |  |  | 10   | 15.5 |
| 1818 | 208 | 163 |  |  | 5    | 16   |
| 1823 | 8   | 8   |  |  | 10.5 | 17.5 |

|               |          |          |          |          |          |          |
|---------------|----------|----------|----------|----------|----------|----------|
| <b>19(KO)</b> | <b>1</b> | <b>1</b> | <b>4</b> | <b>S</b> | <b>.</b> | <b>.</b> |
|---------------|----------|----------|----------|----------|----------|----------|

|               |          |          |          |          |          |          |
|---------------|----------|----------|----------|----------|----------|----------|
| <b>20(KR)</b> | <b>1</b> | <b>1</b> | <b>4</b> | <b>T</b> | <b>.</b> | <b>.</b> |
|---------------|----------|----------|----------|----------|----------|----------|

|              |          |          |          |          |          |          |
|--------------|----------|----------|----------|----------|----------|----------|
| <b>21(M)</b> | <b>1</b> | <b>1</b> | <b>4</b> | <b>T</b> | <b>.</b> | <b>.</b> |
|--------------|----------|----------|----------|----------|----------|----------|

|               |           |           |          |                |  |           |
|---------------|-----------|-----------|----------|----------------|--|-----------|
| <b>22(MH)</b> | <b>28</b> | <b>20</b> | <b>2</b> | <b>Beijing</b> |  | <b>18</b> |
|---------------|-----------|-----------|----------|----------------|--|-----------|

|      |   |   |  |  |    |    |
|------|---|---|--|--|----|----|
| 2201 | 5 | 3 |  |  | 14 | 21 |
|------|---|---|--|--|----|----|

|      |   |   |  |  |   |    |
|------|---|---|--|--|---|----|
| 2207 | 4 | 3 |  |  | 6 | 10 |
|------|---|---|--|--|---|----|

|              |          |          |          |                |  |              |
|--------------|----------|----------|----------|----------------|--|--------------|
| <b>23(W)</b> | <b>7</b> | <b>4</b> | <b>2</b> | <b>Beijing</b> |  | <b>211.5</b> |
|--------------|----------|----------|----------|----------------|--|--------------|

WGS: Whole genome sequencing

**Supplementary Table S3.** SNP differences by epidemiologic link and history of prior MDR TB for participants with available WGS and matching RFLP pattern.

|                                | <b>Person-to-person links<br/>(N = 29)</b> |           | <b>Hospital-based links<br/>(N = 37)</b> |           | <b>Unlinked<br/>(N = 240)</b> |          |
|--------------------------------|--------------------------------------------|-----------|------------------------------------------|-----------|-------------------------------|----------|
|                                | Prior MDR                                  | No MDR    | Prior MDR                                | No MDR    | Prior MDR                     | No MDR   |
| <b>N (%)</b>                   | 4 (14)                                     | 25 (86)   | 19 (54)                                  | 16 (46)   | 68 (28)                       | 172 (72) |
| <b>SNPs<br/>(median [IQR])</b> | 44 (31-50)                                 | 10 (6-19) | 18 (15-27)                               | 12 (9-18) | 5 (2-14)                      | 5 (3-8)  |
